# Supplementary material for: Kinesin-1 conformational dynamics are controlled by a cargo-sensitive TPR switch
Source: eLife journal article supplement (doi:10.7554/elife.109462), 2025-11-18

WT WT-KinTag ElbowLock

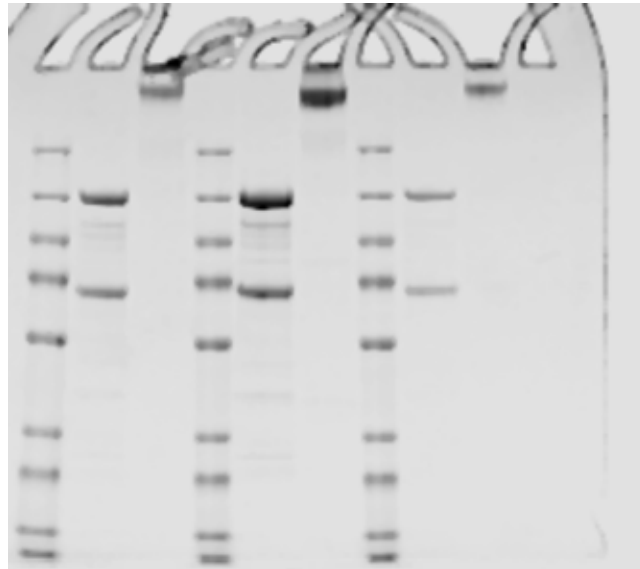

ElbowLock-ElbowLock-  
Kintag deltaTDS Not used

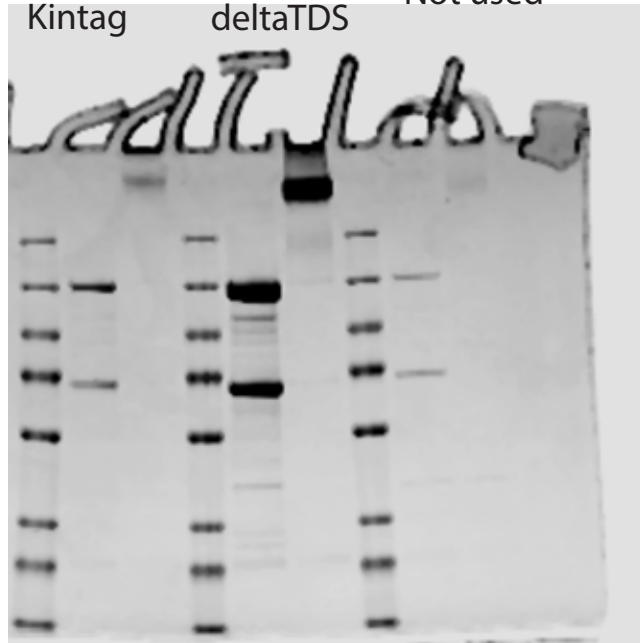

ElbowLock-Nanobody (bottom)

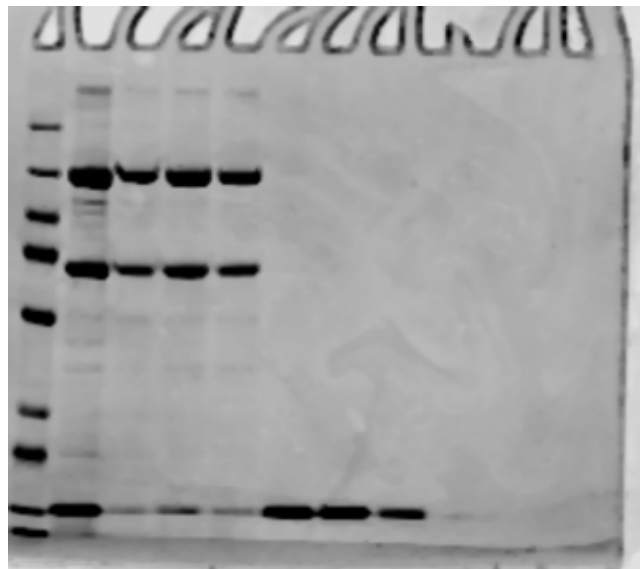

Supplement: fig1-figsupp2-data1 [file elife-109462-fig1-figsupp2-data1-v1.pdf]
