# Supplementary material for: Kinesin-1 conformational dynamics are controlled by a cargo-sensitive TPR switch
Source: eLife journal article supplement (doi:10.7554/elife.109462), 2025-11-18

Figure 1 -supplement 3

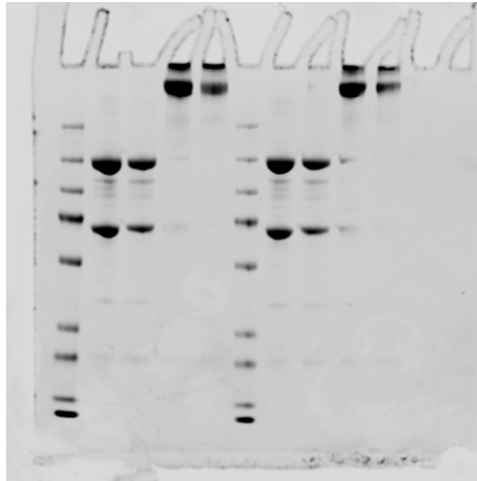

Supplement: fig1-figsupp3-data1 [file elife-109462-fig1-figsupp3-data1-v1.pdf]
