# Supplementary material for: Kinesin-1 conformational dynamics are controlled by a cargo-sensitive TPR switch
Source: eLife journal article supplement (doi:10.7554/elife.109462), 2025-11-18

Input KHC / KLC uncropped

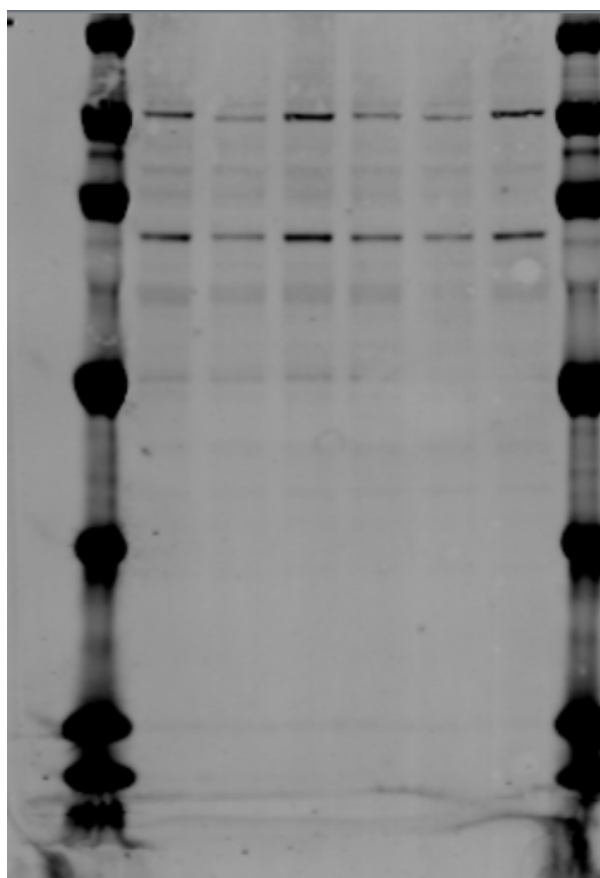

Bound KHC / KLC uncropped

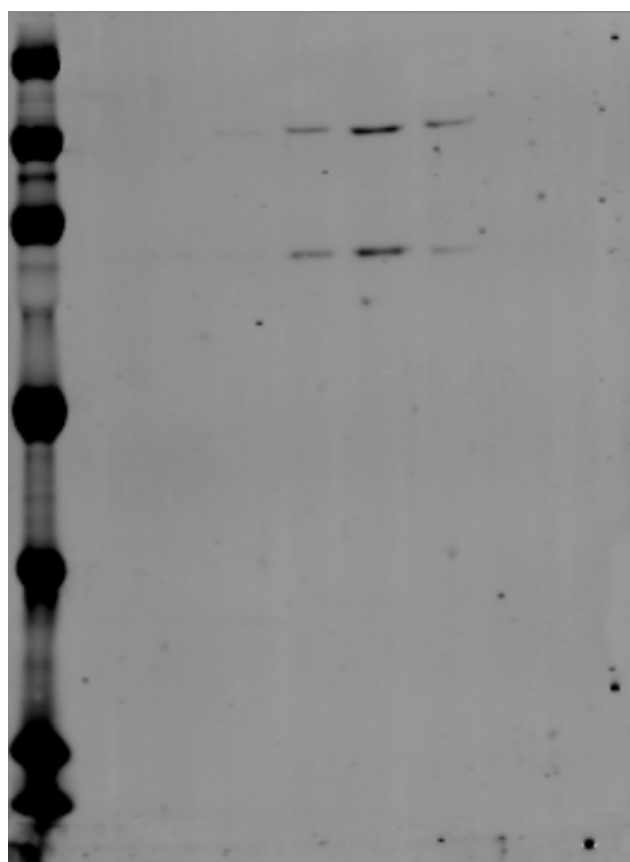

Supplement: fig5-data1 [file elife-109462-fig5-data1-v1.pdf]
